# Supplementary material for: The First Non-Pyrophoric Precursor for the Low Temperature Deposition of Metallic Aluminium
Source: Research Square preprint supplement (doi:10.21203/rs.3.rs-5544055/v1), 2024-12-09
Supplement: Supplementary file 1 [file 0c731fead8ea1bd4ce6be717.pdf]

checkCIF (basic structural check) running

Checking for embedded fcf data in CIF ...  
No extractable fcf data in found in CIF

checkCIF/PLATON (basic structural check)

Structure factors have been supplied for datablock(s) xstr1130

THIS REPORT IS FOR GUIDANCE ONLY. IF USED AS PART OF A REVIEW PROCEDURE FOR PUBLICATION, IT SHOULD NOT REPLACE THE EXPERTISE OF AN EXPERIENCED CRYSTALLOGRAPHIC REFEREE.

No syntax errors found. [CIF dictionary](#).  
Please wait while processing .... [Interpreting this report](#)  
[Structure factor report](#)

Datablock: xstr1130

Bond precision: C-C = 0.0020 A Wavelength=1.54184  
Cell: a=12.1425(2) b=12.2037(2) c=13.9522(3)  
alpha=90 beta=93.853(2) gamma=90  
Temperature: 151 K  
Volume Calculated 2062.81(7) Reported 2062.81(7)  
Space group C 2/c C 1 2/c 1  
Hall group -C 2yc -C 2yc  
Moiety formula C22 H24 Al Cl N2 O2 C11 H12 Al0.5 Cl0.5 N O  
Sum formula C22 H24 Al Cl N2 O2 C11 H12 Al0.5 Cl0.5 N O  
Mr 410.86 205.44  
Dx,g cm-3 1.323 1.323  
Z 4 8  
Mu (mm-1) 2.212 2.212  
F000 864.0 868.6  
F000' 868.41  
h,k,lmax 14,15,17 15,15,17  
Nref 2051 2036  
Tmin,Tmax 0.802,0.957 0.911,1.000  
Tmin' 0.802  
Correction method= # Reported T Limits: Tmin=0.911 Tmax=1.000  
AbsCorr = MULTI-SCAN  
Data completeness= 0.993 Theta(max)= 72.640  
R(reflections)= 0.0309( 1915) wR2(reflections)= 0.0865( 2036)  
S = 1.070 Npar= 130

The following ALERTS were generated. Each ALERT has the format  
[test-name](#) [ALERT](#) [alert-type](#) [alert-level](#).  
Click on the hyperlinks for more details of the test.

 **Alert level C**  
[PLAT041 ALERT 1 C](#) Calc. and Reported SumFormula Strings Differ Please Check  
Calc: C11 H12 Al0.50 Cl0.50 N O  
Rep.: C11 H12 Al0.5 Cl0.5 N O  
[PLAT042 ALERT 1 C](#) Calc. and Reported MoietyFormula Strings Differ Please Check  
Calc: C22 H24 Al Cl N2 O2  
Rep.: C11 H12 Al0.5 Cl0.5 N O  
[PLAT767 ALERT 4 C](#) INS Embedded LIST 6 Instruction Should be LIST 4 Please Check  
[PLAT911 ALERT 3 C](#) Missing FCF Refl Between Tmin & Sth/L= 0.600 6 Report  
0 2 0, 0 4 0, -2 0 2, 0 0 2, 0 2 3, -2 4 16,

 **Alert level G**  
[PLAT045 ALERT 1 G](#) Calculated and Reported Z Differ by a Factor ... 0.500 Check  
[PLAT068 ALERT 1 G](#) Reported F000 Differs from Calcd (or Missing)... Please Check  
[PLAT073 ALERT 1 G](#) H-atoms ref, but \_hydrogen\_treatment Reported as constr Check  
[PLAT769 ALERT 4 G](#) CIF Embedded Explicitly Supplied Scattering Data Please Note  
[PLAT794 ALERT 5 G](#) Tentative Bond Valency for All (III) 3.00 Info  
[PLAT912 ALERT 4 G](#) Missing # of FCF Reflections Above Sth/L= 0.600 10 Note  
[PLAT913 ALERT 3 G](#) Missing # of Very Strong Reflections in FCF ... 3 Note  
0 2 0, 0 4 0, 0 2 3,  
[PLAT969 ALERT 5 G](#) The 'Henn et al.' R-Factor-gap value ..... 4,949 Note  
Predicted wR2: Based on SigI\*\*2 1.75 or SHELX Weight 8.08  
[PLAT978 ALERT 2 G](#) Number C-C Bonds with Positive Residual Density. 12 Info  
[PLAT982 ALERT 1 G](#) The C-f' = 0.0192 Deviates from IT-value = 0.0181 Check  
And 3 other PLAT982 Alerts  
More ...  
[PLAT983 ALERT 1 G](#) The Al-f'' = 0.2420 Deviates from IT-Value = 0.2455 Check  
And 2 other PLAT983 Alerts  
More ...

0 **ALERT level A** = Most likely a serious problem - resolve or explain  
0 **ALERT level B** = A potentially serious problem, consider carefully  
4 **ALERT level C** = Check. Ensure it is not caused by an omission or oversight  
16 **ALERT level G** = General information/check it is not something unexpected  
  
12 **ALERT type 1** CIF construction/syntax error, inconsistent or missing data  
1 **ALERT type 2** Indicator that the structure model may be wrong or deficient  
2 **ALERT type 3** Indicator that the structure quality may be low  
3 **ALERT type 4** Improvement, methodology, query or suggestion  
2 **ALERT type 5** Informative message, check

It is advisable to attempt to resolve as many as possible of the alerts in all categories. Often the minor alerts point to easily fixed oversights, errors and omissions in your CIF or refinement strategy, so attention to these fine details can be worthwhile. In order to resolve some of the more serious problems it may be necessary to carry out additional measurements or structure refinements. However, the purpose of your study may justify the reported deviations and the more serious of these should normally be commented upon in the discussion or experimental section of a paper or in the "special\_details" fields of the CIF. checkCIF was carefully designed to identify outliers and unusual parameters, but every test has its limitations and alerts that are not important in a particular case may appear. Conversely, the absence of alerts does not guarantee there are no aspects of the results needing attention. It is up to the individual to critically assess their own results and, if necessary, seek expert advice.

Publication of your CIF in IUCr journals

A basic structural check has been run on your CIF. These basic checks will be run on all CIFs submitted for publication in IUCr journals (*Acta Crystallographica*, *Journal of Applied Crystallography*, *Journal of Synchrotron Radiation*); however, if you intend to submit to *Acta Crystallographica Section C* or *E* or *IUCrData*, you should make sure that [full publication checks](#) are run on the final version of your CIF prior to submission.

Publication of your CIF in other journals

Please refer to the *Notes for Authors* of the relevant journal for any special instructions relating to CIF submission.

---

PLATON version of 22/08/2024; check.def file version of 21/08/2024

**Datablock xstr1130** - ellipsoid plot

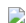

---

[Download CIF editor \(publCIF\) from the IUCr](#)  
[Download CIF editor \(enCIFer\) from the CCDC](#)  
[Test a new CIF entry.](#)
