# Supplementary material for: The First Non-Pyrophoric Precursor for the Low Temperature Deposition of Metallic Aluminium
Source: Research Square preprint supplement (doi:10.21203/rs.3.rs-5544055/v1), 2024-12-09
Supplement: Supplementary file 5 [file 6b2619e2e45fef462cdf4401.pdf]

# checkCIF (basic structural check) running

Checking for embedded fcf data in CIF ...

No extractable fcf data in found in CIF

## checkCIF/PLATON (basic structural check)

Structure factors have been supplied for datablock(s) xstr0887

THIS REPORT IS FOR GUIDANCE ONLY. IF USED AS PART OF A REVIEW PROCEDURE FOR PUBLICATION, IT SHOULD NOT REPLACE THE EXPERTISE OF AN EXPERIENCED CRYSTALLOGRAPHIC REFEREE.

No syntax errors found. [CIF dictionary](#)

Please wait while processing .... [Interpreting this report](#)

[Structure factor report](#)

### Datablock: xstr0887

|                    |                                                  |                    |
|--------------------|--------------------------------------------------|--------------------|
| Bond precision:    | C-C = 0.0027 Å                                   | Wavelength=1.54184 |
| Cell:              | a=11.3290(3)      b=11.3991(3)      c=14.1862(3) |                    |
|                    | alpha=90      beta=94.627(2)      gamma=90       |                    |
| Temperature: 150 K |                                                  |                    |

  

|                        | Calculated          | Reported            |
|------------------------|---------------------|---------------------|
| Volume                 | 1826.04(8)          | 1826.04(7)          |
| Space group            | C 2/c               | C 1 2/c 1           |
| Hall group             | -C 2yc              | -C 2yc              |
| Moiety formula         | C16 H28 Al Cl N2 O2 | C16 H28 Al Cl N2 O2 |
| Sum formula            | C16 H28 Al Cl N2 O2 | C16 H28 Al Cl N2 O2 |
| Mr                     | 342.83              | 342.85              |
| Dx, g cm <sup>-3</sup> | 1.247               | 1.247               |
| Z                      | 4                   | 4                   |
| Mu (mm <sup>-1</sup> ) | 2.381               | 2.381               |
| F000                   | 736.0               | 740.2               |
| F000'                  | 740.00              |                     |
| h,k,lmax               | 12,12,15            | 12,12,15            |
| Nref                   | 1272                | 1267                |
| Tmin,Tmax              | 0.593,0.827         | 0.703,1.000         |
| Tmin'                  | 0.414               |                     |

Correction method= # Reported T Limits: Tmin=0.703 Tmax=1.000  
AbsCorr = MULTI-SCAN

Data completeness= 0.996      Theta(max)= 57.880

R(reflections)= 0.0246( 1199)      wR2(reflections)= 0.0686( 1267)

S = 1.075      Npar= 157

The following ALERTS were generated. Each ALERT has the format

**test-name\_ALERT\_alert-type\_alert-level.**

Click on the hyperlinks for more details of the test.

**Alert level A**

[THETM01 ALERT 3 A](#) The value of  $\sin(\theta_{\max})/\lambda$  is less than 0.550  
 Calculated  $\sin(\theta_{\max})/\lambda = 0.5493$   
[PLAT027 ALERT 3 A](#) \_diffrn\_refl\_theta\_full value (too) Low ..... 57.88 Degree

---

**Alert level C**

[PLAT088 ALERT 3 C](#) Poor Data / Parameter Ratio ..... 8.07 Note  
[PLAT222 ALERT 3 C](#) NonSolvent Resd 1 H Uiso(max)/Uiso(min) Range 5.2 Ratio  
[PLAT911 ALERT 3 C](#) Missing FCF Refl Between Thmin & STh/L= 0.549 5 Report  
 4 4 3, 11 1 6, -2 0 8, 8 4 10, -6 6 12,

---

**Alert level G**

[PLAT068 ALERT 1 G](#) Reported F000 Differs from Calcd (or Missing)... Please Check  
[PLAT769 ALERT 4 G](#) CIF Embedded Explicitly Supplied Scattering Data Please Note  
[PLAT794 ALERT 5 G](#) Tentative Bond Valency for Al2 (III) . 3.00 Info  
[PLAT909 ALERT 3 G](#) Percentage of I>2sig(I) Data at Theta(Max) Still 100% Note  
[PLAT933 ALERT 2 G](#) Number of HKL-OMIT Records in Embedded .res File 2 Note  
 -2 0 8, 4 4 3,  
[PLAT969 ALERT 5 G](#) The 'Henn et al.' R-Factor-gap value ..... 6.460 Note  
 Predicted wR2: Based on SigI\*\*2 1.06 or SHELX Weight 6.38  
[PLAT978 ALERT 2 G](#) Number C-C Bonds with Positive Residual Density. 5 Info  
[PLAT982 ALERT 1 G](#) The C-f'= 0.0192 Deviates from IT-value = 0.0181 Check

**And 3 other PLAT982 Alerts**

More ...

[PLAT983 ALERT 1 G](#) The Al-f'= 0.2420 Deviates from IT-Value = 0.2455 Check

**And 2 other PLAT983 Alerts**

More ...

- 2 **ALERT level A** = Most likely a serious problem - resolve or explain  
 0 **ALERT level B** = A potentially serious problem, consider carefully  
 3 **ALERT level C** = Check. Ensure it is not caused by an omission or oversight  
 14 **ALERT level G** = General information/check it is not something unexpected

- 8 ALERT type 1 CIF construction/syntax error, inconsistent or missing data  
 2 ALERT type 2 Indicator that the structure model may be wrong or deficient  
 6 ALERT type 3 Indicator that the structure quality may be low  
 1 ALERT type 4 Improvement, methodology, query or suggestion  
 2 ALERT type 5 Informative message, check
-

It is advisable to attempt to resolve as many as possible of the alerts in all categories. Often the minor alerts point to easily fixed oversights, errors and omissions in your CIF or refinement strategy, so attention to these fine details can be worthwhile. In order to resolve some of the more serious problems it may be necessary to carry out additional measurements or structure refinements. However, the purpose of your study may justify the reported deviations and the more serious of these should normally be commented upon in the discussion or experimental section of a paper or in the "special\_details" fields of the CIF. checkCIF was carefully designed to identify outliers and unusual parameters, but every test has its limitations and alerts that are not important in a particular case may appear. Conversely, the absence of alerts does not guarantee there are no aspects of the results needing attention. It is up to the individual to critically assess their own results and, if necessary, seek expert advice.

### Publication of your CIF in IUCr journals

A basic structural check has been run on your CIF. These basic checks will be run on all CIFs submitted for publication in IUCr journals (*Acta Crystallographica*, *Journal of Applied Crystallography*, *Journal of Synchrotron Radiation*); however, if you intend to submit to *Acta Crystallographica Section C* or *E* or *IUCrData*, you should make sure that [full publication checks](#) are run on the final version of your CIF prior to submission.

### Publication of your CIF in other journals

Please refer to the *Notes for Authors* of the relevant journal for any special instructions relating to CIF submission.

### Validation response form

Please find below a validation response form (VRF) that can be filled in and pasted into your CIF.

```
# start Validation Reply Form
_vrf_THETM01_xstr0887
;
PROBLEM: The value of sine(theta_max)/wavelength is less than 0.550
RESPONSE: ...
;
_vrf_PLAT027_xstr0887
;
PROBLEM: _diffn_reflns_theta_full value (too) Low .....      57.88 Degree
RESPONSE: ...
;
# end Validation Reply Form
```

---

PLATON version of 22/08/2024; check.def file version of 21/08/2024

## Datablock xstr0887 - ellipsoid plot

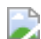

---

[Download CIF editor \(pubCIF\) from the IUCr](#)  
[Download CIF editor \(enCIFer\) from the CCDC](#)  
[Test a new CIF entry.](#)
