# Supplementary material for: The First Non-Pyrophoric Precursor for the Low Temperature Deposition of Metallic Aluminium
Source: Research Square preprint supplement (doi:10.21203/rs.3.rs-5544055/v1), 2024-12-09
Supplement: Supplementary file 6 [file ae2b26a2bf54d35c08d792ed.pdf]

checkCIF (basic structural check) running

Checking for embedded fcf data in CIF ...  
No extractable fcf data in found in CIF

checkCIF/PLATON (basic structural check)

Structure factors have been supplied for datablock(s) xstr1167

THIS REPORT IS FOR GUIDANCE ONLY. IF USED AS PART OF A REVIEW PROCEDURE FOR PUBLICATION, IT SHOULD NOT REPLACE THE EXPERTISE OF AN EXPERIENCED CRYSTALLOGRAPHIC REFEREE.

No syntax errors found. [CIF dictionary](#).  
Please wait while processing .... [Interpreting this report](#)

[Structure factor report](#)

Datablock: xstr1167

Bond precision: C-C = 0.0022 A Wavelength=1.54184  
Cell: a=8.97922(17) b=13.8461(3) c=15.0590(3)  
alpha=68.945(2) beta=85.2964(17) gamma=72.7480(18)  
Temperature: 150 K  
Volume Calculated 1668.00(7) Reported 1668.01(7)  
Space group P -1 P -1  
Hall group -P 1 -P 1  
Moiety formula C14 H24 Al Cl N2 O2 2(C7 H12 Al0.5 Cl0.5 N O)  
Sum formula C14 H24 Al Cl N2 O2 C14 H24 Al Cl N2 O2  
Mr 314.78 314.79  
Dx,g cm-3 1.253 1.254  
Z 4 4  
Mu (mm-1) 2.563 2.563  
F000 672.0 676.0  
F000' 675.86  
h,k,lmax 11,17,18 11,17,18  
Nref 6714 6554  
Tmin,Tmax 0.813,0.825 0.753,1.000  
Tmin' 0.737  
Correction method= # Reported T Limits: Tmin=0.753 Tmax=1.000  
AbsCorr = MULTI-SCAN  
Data completeness= 0.976 Theta(max)= 73.440  
R(reflections)= 0.0337( 6267) wR2(reflections)= 0.0917( 6554)  
S = 1.046 Npar= 373

The following ALERTS were generated. Each ALERT has the format  
[test-name\\_ALERT\\_alert-type\\_alert-level](#).  
Click on the hyperlinks for more details of the test.

 Alert level C  
[PLAT042\\_ALERT\\_1\\_C](#) Calc. and Reported MoietyFormula Strings Differ Please Check  
Calc: C14 H24 Al Cl N2 O2  
Rep.: 2(C7 H12 Al0.5 Cl0.5 N O)  
[PLAT767\\_ALERT\\_4\\_C](#) INS Embedded LIST 6 Instruction Should be LIST 4 Please Check  
[PLAT911\\_ALERT\\_3\\_C](#) Missing FCF Refl Between Tmin & Sth/L= 0.600 31 Report  
1 0 0, -2 1 0, 1 1 0, 1 2 0, 2 3 0, 7 -8 1,  
-1 -3 1, 0 -1 1, 1 1 1, 1 4 1, -2 -2 2, -1 -2 2,  
-2 -1 2, -1 -1 2, -2 0 2, -1 0 2, 0 0 2, -1 2 2,  
-9-10 3, -1 -1 3, 0 -1 3, -7-12 4, -8-11 4, 0 2 4,  
1 3 4, -7-11 5, -8-10 5, -7-10 6, -7 -9 6, -7 -9 7,  
-6 -9 9,  
[PLAT913\\_ALERT\\_3\\_C](#) Missing # of Very Strong Reflections in FCF .... 7 Note  
1 0 0, 1 1 1, -2 -2 2, -1 -2 2, 0 0 2, -1 -1 3,  
0 2 4,

 Alert level G  
[PLAT068\\_ALERT\\_1\\_G](#) Reported F000 Differs from Calcd (or Missing)... Please Check  
[PLAT073\\_ALERT\\_1\\_G](#) H-atoms ref, but \_hydrogen\_treatment Reported as constr Check  
[PLAT232\\_ALERT\\_2\\_G](#) Hirshfeld Test Diff (M-X) Al2 --04 . 5.3 s.u.  
And 2 other PLAT232 Alerts  
More ...  
[PLAT769\\_ALERT\\_4\\_G](#) CIF Embedded Explicitly Supplied Scattering Data Please Note  
[PLAT794\\_ALERT\\_5\\_G](#) Tentative Bond Valency for Al1 (III) . 3.02 Info  
[PLAT794\\_ALERT\\_5\\_G](#) Tentative Bond Valency for Al2 (III) . 3.02 Info  
[PLAT910\\_ALERT\\_3\\_G](#) Missing # of FCF Reflection(s) Below Theta(Min). 1 Note  
0 0 1,  
[PLAT912\\_ALERT\\_4\\_G](#) Missing # of FCF Reflections Above Sth/L= 0.600 128 Note  
[PLAT941\\_ALERT\\_3\\_G](#) Average HKL Measurement Multiplicity ..... 3.7 Low  
[PLAT969\\_ALERT\\_5\\_G](#) The 'Henn et al.' R-Factor-gap value ..... 3.941 Note  
Predicted wR2: Based on SigI\*\*2 2.33 or SHELX Weight 8.77  
[PLAT978\\_ALERT\\_2\\_G](#) Number C-C Bonds with Positive Residual Density. 4 Info  
[PLAT982\\_ALERT\\_1\\_G](#) The C-f'= 0.0192 Deviates from IT-value = 0.0181 Check  
And 3 other PLAT982 Alerts  
More ...  
[PLAT983\\_ALERT\\_1\\_G](#) The Al-f''= 0.2420 Deviates from IT-Value = 0.2455 Check  
And 2 other PLAT983 Alerts  
More ...

0 ALERT level A = Most likely a serious problem - resolve or explain  
0 ALERT level B = A potentially serious problem, consider carefully  
4 ALERT level C = Check. Ensure it is not caused by an omission or oversight  
20 ALERT level G = General information/check it is not something unexpected  
10 ALERT type 1 CIF construction/syntax error, inconsistent or missing data  
4 ALERT type 2 Indicator that the structure model may be wrong or deficient  
4 ALERT type 3 Indicator that the structure quality may be low  
3 ALERT type 4 Improvement, methodology, query or suggestion  
3 ALERT type 5 Informative message, check

It is advisable to attempt to resolve as many as possible of the alerts in all categories. Often the minor alerts point to easily fixed oversights, errors and omissions in your CIF or refinement strategy, so attention to these fine details can be worthwhile. In order to resolve some of the more serious problems it may be necessary to carry out additional measurements or structure refinements. However, the purpose of your study may justify the reported deviations and the more serious of these should normally be commented upon in the discussion or experimental section of a paper or in the "special details" fields of the CIF. checkCIF was carefully designed to identify outliers and unusual parameters, but every test has its limitations and alerts that are not important in a particular case may appear. Conversely, the absence of alerts does not guarantee there are no aspects of the results needing attention. It is up to the individual to critically assess their own results and, if necessary, seek expert advice.

Publication of your CIF in IUCr journals

A basic structural check has been run on your CIF. These basic checks will be run on all CIFs submitted for publication in IUCr journals (*Acta Crystallographica*, *Journal of Applied*

*Crystallography, Journal of Synchrotron Radiation*); however, if you intend to submit to *Acta Crystallographica Section C* or *E* or *IUCrData*, you should make sure that [full publication checks](#) are run on the final version of your CIF prior to submission.

**Publication of your CIF in other journals**

Please refer to the *Notes for Authors* of the relevant journal for any special instructions relating to CIF submission.

---

PLATON version of 22/08/2024; check.def file version of 21/08/2024

**Datablock xstr1167 - ellipsoid plot**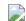

---

[Download CIF editor \(publCIF\) from the IUCr](#)  
[Download CIF editor \(enCIFer\) from the CCDC](#)  
[Test a new CIF entry](#)
