# Supplementary material for: The First Non-Pyrophoric Precursor for the Low Temperature Deposition of Metallic Aluminium
Source: Research Square preprint supplement (doi:10.21203/rs.3.rs-5544055/v1), 2024-12-09
Supplement: Supplementary file 7 [file ce253efa4002c1bb8c1e8cd4.pdf]

checkCIF (basic structural check) running

Checking for embedded fcf data in CIF ...  
Found embedded fcf data in CIF. Extracting fcf data from uploaded CIF, please wait .....

checkCIF/PLATON (basic structural check)

Structure factors have been supplied for datablock(s) 1

THIS REPORT IS FOR GUIDANCE ONLY. IF USED AS PART OF A REVIEW PROCEDURE FOR PUBLICATION, IT SHOULD NOT REPLACE THE EXPERTISE OF AN EXPERIENCED CRYSTALLOGRAPHIC REFEREE.

No syntax errors found. [CIF dictionary](#).  
Please wait while processing .... [Interpreting this report](#)  
[Structure factor report](#)

Datablock: 1

Bond precision: C-C = 0.0103 Å Wavelength=1.54184  
Cell: a=11.9121(2) b=13.0432(1) c=17.8371(2)  
alpha=103.510(1) beta=102.825(1) gamma=95.033(1)  
Temperature: 150 K  
Volume 2598.84(6) 2598.84(6)  
Space group P 1 P 1  
Hall group P 1 P 1  
Moiety formula C43 H81 Al4 Li2 N3 O4 2(C43 H81 Al4 Li2 N3 O4)  
Sum formula C43 H81 Al4 Li2 N3 O4 C86 H162 Al8 Li4 N6 O8  
Mr 825.91 1651.81  
Dx,g cm-3 1.055 1.055  
Z 2 1  
Mu (mm-1) 1.119 1.119  
F000 900.0 900.0  
F000' 903.68  
h,k,lmax 15,16,22 14,16,22  
Nref 22568[ 11284] 20140  
Tmin,Tmax 0.886,0.935 0.803,0.923  
Tmin' 0.836  
Correction method= # Reported T Limits: Tmin=0.803 Tmax=0.923  
AbsCorr = ANALYTICAL  
Data completeness= 1.78/0.89 Theta(max)= 79.283  
R(reflections)= 0.0727( 17878) wR2(reflections)= 0.2070( 20140)  
S = 1.057 Npar= 1107

The following ALERTS were generated. Each ALERT has the format  
[test-name\\_ALERT\\_alert-type\\_alert-level](#).  
Click on the hyperlinks for more details of the test.

Alert level B  
[PLAT084\\_ALERT\\_2\\_B](#) Ratio of Maximum / Minimum Residual Density ... 4.63 Report  
[PLAT087\\_ALERT\\_2\\_B](#) Large Reported Max. (Positive) Residual Density 1.76 eA-3  
[PLAT340\\_ALERT\\_3\\_B](#) Low Bond Precision on C-C Bonds ..... 0.01034 Ang.  
[PLAT360\\_ALERT\\_2\\_B](#) Short C(sp3)-C(sp3) Bond C61 - C62 . 1.33 Ang.

Alert level C  
[DIFMX02\\_ALERT\\_1\\_C](#) The maximum difference density is > 0.1\*ZMAX\*0.75  
The relevant atom site should be identified.  
[PLAT041\\_ALERT\\_1\\_C](#) Calc. and Reported SumFormula Strings Differ Please Check  
Calc: C43 H81 Al4 Li2 N3 O4  
Rep.: C86 H162 Al8 Li4 N6 O8  
[PLAT042\\_ALERT\\_1\\_C](#) Calc. and Reported MoietyFormula Strings Differ Please Check  
Calc: C43 H81 Al4 Li2 N3 O4  
Rep.: 2(C43 H81 Al4 Li2 N3 O4)  
[PLAT220\\_ALERT\\_2\\_C](#) NonSolvent Resd 1 C Ueq(max)/Ueq(min) Range 5.0 Ratio  
[PLAT220\\_ALERT\\_2\\_C](#) NonSolvent Resd 2 C Ueq(max)/Ueq(min) Range 5.1 Ratio  
[PLAT222\\_ALERT\\_3\\_C](#) NonSolvent Resd 1 H Uiso(max)/Uiso(min) Range 9.7 Ratio  
[PLAT222\\_ALERT\\_3\\_C](#) NonSolvent Resd 2 H Uiso(max)/Uiso(min) Range 6.2 Ratio  
[PLAT230\\_ALERT\\_2\\_C](#) Hirshfeld Test Diff for O8 --C85 . 6.9 s.u.  
[PLAT234\\_ALERT\\_4\\_C](#) Large Hirshfeld Difference O2 --C61 . 0.17 Ang.  
[PLAT234\\_ALERT\\_4\\_C](#) Large Hirshfeld Difference C59 --C60 . 0.16 Ang.  
[PLAT241\\_ALERT\\_2\\_C](#) High 'MainMol' Ueq as Compared to Neighbors of C59 Check  
[PLAT242\\_ALERT\\_2\\_C](#) Low 'MainMol' Ueq as Compared to Neighbors of O3 Check  
And 5 other PLAT242 Alerts  
More ...  
[PLAT245\\_ALERT\\_2\\_C](#) U(iso) Ha Smaller than U(eq) Li1 by 0.035 Ang\*\*2  
And 3 other PLAT245 Alerts  
More ...  
[PLAT360\\_ALERT\\_2\\_C](#) Short C(sp3)-C(sp3) Bond C57 - C58 . 1.38 Ang.  
And 2 other PLAT360 Alerts  
More ...  
[PLAT911\\_ALERT\\_3\\_C](#) Missing FCF Refl Between Thmin & STh/L= 0.600 7 Report  
-11 -8 2, -11 -8 3, -12 -6 3, -12 -7 4, -12 -7 5, -12 -7 6,  
-11 -8 12,  
[PLAT971\\_ALERT\\_2\\_C](#) Check Calcd Resid. Dens. 1.20Ang From Al5 1.82 eA-3  
And 2 other PLAT971 Alerts  
More ...

Alert level G  
[PLAT033\\_ALERT\\_4\\_G](#) Flack x Value Deviates > 3.0 \* sigma from Zero . 0.120 Note  
[PLAT045\\_ALERT\\_1\\_G](#) Calculated and Reported Z Differ by a Factor ... 2 Check  
[PLAT072\\_ALERT\\_2\\_G](#) SHELXL First Parameter in WGHT Unusually Large 0.15 Report  
[PLAT154\\_ALERT\\_1\\_G](#) The s.u.'s on the Cell Angles are Equal ..(Note) 0.001 Degree  
[PLAT303\\_ALERT\\_2\\_G](#) Full Occupancy Atom Ha with # Connections 2.00 Check  
And 7 other PLAT303 Alerts  
More ...  
[PLAT380\\_ALERT\\_4\\_G](#) Incorrectly? Oriented X(sp2)-Methyl Moiety ..... C39 Check  
[PLAT720\\_ALERT\\_4\\_G](#) Number of Unusual/Non-Standard Labels ..... 15 Note  
Ha Hb Hc Hd He Hf Hg Hh  
Hi Hj Hk Hl Hm Hn Ho  
[PLAT910\\_ALERT\\_3\\_G](#) Missing # of FCF Reflection(s) Below Theta(Min). 1 Note  
0 0 1,  
[PLAT912\\_ALERT\\_4\\_G](#) Missing # of FCF Reflections Above STh/L= 0.600 522 Note  
[PLAT969\\_ALERT\\_5\\_G](#) The 'Henn et al.' R-Factor-gap value ..... 5.261 Note  
Predicted wR2: Based on SigI\*\*2 3.93 or SHELX Weight 19.58  
[PLAT978\\_ALERT\\_2\\_G](#) Number C-C Bonds with Positive Residual Density. 0 Info  
[PLAT992\\_ALERT\\_5\\_G](#) Repd & Actual \_reflns\_number\_gt Values Differ by 2 Check

0 ALERT level A = Most likely a serious problem - resolve or explain  
4 ALERT level B = A potentially serious problem, consider carefully  
28 ALERT level C = Check. Ensure it is not caused by an omission or oversight  
19 ALERT level G = General information/check it is not something unexpected  
  
5 ALERT type 1 CIF construction/syntax error, inconsistent or missing data  
33 ALERT type 2 Indicator that the structure model may be wrong or deficient  
5 ALERT type 3 Indicator that the structure quality may be low  
6 ALERT type 4 Improvement, methodology, query or suggestion  
2 ALERT type 5 Informative message, check

It is advisable to attempt to resolve as many as possible of the alerts in all categories. Often the minor alerts point to easily fixed oversights, errors and omissions in your CIF or refinement strategy, so attention to these fine details can be worthwhile. In order to resolve some of the more serious problems it may be necessary to carry out additional measurements or structure refinements. However, the purpose of your study may justify the reported deviations and the more serious of these should normally be commented upon in the discussion or experimental section of a paper or in the "special\_details" fields of the CIF. checkCIF was carefully designed to identify outliers and unusual parameters, but every test has its limitations and alerts that are not important in a particular case may appear. Conversely, the absence of alerts does not guarantee there are no aspects of the results needing attention. It is up to the individual to critically assess their own results and, if necessary, seek expert advice.

**Publication of your CIF in IUCr journals**

A basic structural check has been run on your CIF. These basic checks will be run on all CIFs submitted for publication in IUCr journals (*Acta Crystallographica*, *Journal of Applied Crystallography*, *Journal of Synchrotron Radiation*); however, if you intend to submit to *Acta Crystallographica Section C* or *E* or *IUCrData*, you should make sure that [full publication checks](#) are run on the final version of your CIF prior to submission.

**Publication of your CIF in other journals**

Please refer to the *Notes for Authors* of the relevant journal for any special instructions relating to CIF submission.

---

PLATON version of 11/11/2024; check.def file version of 11/11/2024

**Datablock 1 - ellipsoid plot**

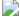

---

[Download CIF editor \(pubCIF\) from the IUCr](#)  
[Download CIF editor \(enCIFer\) from the CCDC](#)  
[Test a new CIF entry.](#)
