# Supplementary material for: The First Non-Pyrophoric Precursor for the Low Temperature Deposition of Metallic Aluminium
Source: Research Square preprint supplement (doi:10.21203/rs.3.rs-5544055/v1), 2024-12-09
Supplement: Supplementary file 8 [file ec5148acfb2a40aff9b74c5f.pdf]

checkCIF (basic structural check) running

Checking for embedded fcf data in CIF ...  
Found embedded fcf data in CIF. Extracting fcf data from uploaded CIF, please wait .....

checkCIF/PLATON (basic structural check)

Structure factors have been supplied for datablock(s) xstr1591\_autored2

THIS REPORT IS FOR GUIDANCE ONLY. IF USED AS PART OF A REVIEW PROCEDURE FOR PUBLICATION, IT SHOULD NOT REPLACE THE EXPERTISE OF AN EXPERIENCED CRYSTALLOGRAPHIC REFEREE.

No syntax errors found. [CIF dictionary](#).  
Please wait while processing .... [Interpreting this report](#)  
[Structure factor report](#)

Datablock: xstr1591\_autored2

Bond precision: C-C = 0.0085 Å Wavelength=1.54184  
Cell: a=7.7848(2) b=10.9557(3) c=15.1427(3)  
alpha=90 beta=90 gamma=90  
Temperature: 150 K

|                | Calculated        | Reported          |
|----------------|-------------------|-------------------|
| Volume         | 1291.49(5)        | 1291.49(5)        |
| Space group    | P 21 21 21        | P 21 21 21        |
| Hall group     | P 2ac 2ab         | P 2ac 2ab         |
| Moiety formula | C8 H20 Al2 Li N O | C8 H20 Al2 Li N O |
| Sum formula    | C8 H20 Al2 Li N O | C8 H20 Al2 Li N O |
| Mr             | 207.15            | 207.15            |
| Dx, g cm-3     | 1.065             | 1.065             |
| Z              | 4                 | 4                 |
| Mu (mm-1)      | 1.751             | 1.751             |
| F000           | 448.0             | 448.0             |
| F000'          | 450.51            |                   |
| h,k,lmax       | 9,13,19           | 9,13,19           |
| Nref           | 2774[ 1608]       | 2705              |
| Tmin,Tmax      | 0.863,0.900       | 0.828,1.000       |
| Tmin'          | 0.756             |                   |

Correction method= # Reported T Limits: Tmin=0.828 Tmax=1.000  
AbsCorr = GAUSSIAN  
Data completeness= 1.68/0.98 Theta(max)= 78.945  
R(reflections)= 0.0646( 2505) wR2(reflections)= 0.1768( 2705)  
S = 1.138 Npar= 140

The following ALERTS were generated. Each ALERT has the format  
[test-name](#)[\\_ALERT](#)[\\_alert-type](#)[\\_alert-level](#).  
Click on the hyperlinks for more details of the test.

 [Alert level C](#)  
[STRV001\\_ALERT\\_4\\_C](#) Flack test results are ambiguous.  
From the CIF: \_refine\_ls\_abs\_structure\_Flack 0.350  
From the CIF: \_refine\_ls\_abs\_structure\_Flack\_su 0.110  
[PLAT004\\_ALERT\\_2\\_C](#) Ratio of Maximum / Minimum Residual Density .... 3.57 Report  
[PLAT340\\_ALERT\\_3\\_C](#) Low Bond Precision on C-C Bonds ..... 0.0085 Ang.  
[PLAT906\\_ALERT\\_3\\_C](#) Large K Value in the Analysis of Variance ..... 3.155 Check

 [Alert level G](#)  
[PLAT002\\_ALERT\\_2\\_G](#) Number of Distance or Angle Restraints on AtSite 4 Note  
[PLAT004\\_ALERT\\_5\\_G](#) Polymeric Structure Found with Maximum Dimension 1 Info  
[PLAT023\\_ALERT\\_4\\_G](#) Flack x Value Deviates > 3.0 \* sigma from Zero . 0.350 Note  
[PLAT072\\_ALERT\\_2\\_G](#) SHELXL First Parameter in WGHT Unusually Large 0.10 Report  
[PLAT172\\_ALERT\\_4\\_G](#) The CIF-Embedded .res File Contains DFIX Records 1 Report  
[PLAT176\\_ALERT\\_4\\_G](#) The CIF-Embedded .res File Contains SADI Records 2 Report  
[PLAT303\\_ALERT\\_2\\_G](#) Full Occupancy Atom Hb with # Connections 2.00 Check  
And 2 other PLAT303 Alerts  
More ...  
[PLAT720\\_ALERT\\_4\\_G](#) Number of Unusual/Non-Standard Labels ..... 4 Note  
Ha Hb Hc Hd  
[PLAT764\\_ALERT\\_4\\_G](#) Overcomplete CIF Bond List Detected (Rep/Expd) . 1.46 Ratio  
[PLAT860\\_ALERT\\_3\\_G](#) Number of Least-Squares Restraints ..... 9 Note  
[PLAT912\\_ALERT\\_4\\_G](#) Missing # of FCF Reflections Above Sth/L= 0.600 17 Note  
[PLAT969\\_ALERT\\_5\\_G](#) The 'Henn et al.' R-Factor-gap value ..... 6.998 Note  
Predicted wR2: Based on Sigi\*\*2 2.53 or SHELX Weight 15.53  
[PLAT978\\_ALERT\\_2\\_G](#) Number C-C Bonds with Positive Residual Density. 2 Info

- 0 **ALERT level A** = Most likely a serious problem - resolve or explain  
0 **ALERT level B** = A potentially serious problem, consider carefully  
4 **ALERT level C** = Check. Ensure it is not caused by an omission or oversight  
15 **ALERT level G** = General information/check it is not something unexpected
- 0 **ALERT type 1** CIF construction/syntax error, inconsistent or missing data  
7 **ALERT type 2** Indicator that the structure model may be wrong or deficient  
3 **ALERT type 3** Indicator that the structure quality may be low  
7 **ALERT type 4** Improvement, methodology, query or suggestion  
2 **ALERT type 5** Informative message, check

It is advisable to attempt to resolve as many as possible of the alerts in all categories. Often the minor alerts point to easily fixed oversights, errors and omissions in your CIF or refinement strategy, so attention to these fine details can be worthwhile. In order to resolve some of the more serious problems it may be necessary to carry out additional measurements or structure refinements. However, the purpose of your study may justify the reported deviations and the more serious of these should normally be commented upon in the discussion or experimental section of a paper or in the "special details" fields of the CIF. checkCIF was carefully designed to identify outliers and unusual parameters, but every test has its limitations and alerts that are not important in a particular case may appear. Conversely, the absence of alerts does not guarantee there are no aspects of the results needing attention. It is up to the individual to critically assess their own results and, if necessary, seek expert advice.

Publication of your CIF in IUCr journals

A basic structural check has been run on your CIF. These basic checks will be run on all CIFs submitted for publication in IUCr journals (*Acta Crystallographica*, *Journal of Applied Crystallography*, *Journal of Synchrotron Radiation*); however, if you intend to submit to *Acta Crystallographica Section C* or *E* or *IUCrData*, you should make sure that [full publication checks](#) are run on the final version of your CIF prior to submission.

Publication of your CIF in other journals

Please refer to the *Notes for Authors* of the relevant journal for any special instructions relating to CIF submission.

PLATON version of 11/11/2024; check.def file version of 11/11/2024

**Datablock xstr1591\_autored2** - ellipsoid plot

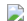

[Download CIF editor \(publCIF\) from the IUCr](#)

[Download CIF editor \(enCIFer\) from the CCDC](#)

[Test a new CIF entry](#)
